# Supplementary material
Source: PubMed Central journal article supplement (PMC6908751)
Supplement: NIHMS1543277-supplement-1.pdf [file NIHMS1543277-supplement-1.pdf]

Data S1. Full Glycan List of Sialoside Microarray Used in this Study. Related to Figure 4.

| Glycan # | Common Name                                                                                                                                          | Structure                                                                            |
|----------|------------------------------------------------------------------------------------------------------------------------------------------------------|--------------------------------------------------------------------------------------|
| 1        | NeuAc $\alpha$ (2-3)Gal $\beta$ (1-4)6-O-sulfo-GlcNAc $\beta$ -propyl-NH <sub>2</sub>                                                                |    |
| 2        | NeuAc $\alpha$ (2-3)Gal $\beta$ (1-4)[Fuc $\alpha$ (1-3)]-6-O-sulfo-GlcNAc $\beta$ -propyl-NH <sub>2</sub>                                           |    |
| 3        | NeuAc $\alpha$ (2-3)6-O-sulfo-Gal $\beta$ (1-4)GlcNAc $\beta$ -ethyl-NH <sub>2</sub>                                                                 |    |
| 4        | NeuAc $\alpha$ (2-3)6-O-sulfo-Gal $\beta$ (1-4)[Fuc $\alpha$ (1-3)]-GlcNAc $\beta$ -propyl-NH <sub>2</sub>                                           |    |
| 5        | NeuAc $\alpha$ (2-3)Gal $\beta$ (1-3)6-O-sulfo-GlcNAc $\beta$ -propyl-NH <sub>2</sub>                                                                |    |
| 6        | NeuAc $\alpha$ (2-3)Gal $\beta$ (1-4)Glc $\beta$ -ethyl-NH <sub>2</sub>                                                                              |    |
| 7        | NeuAc $\alpha$ (2-3)Gal $\beta$ (1-4)GlcNAc $\beta$ -ethyl-NH <sub>2</sub>                                                                           |  |
| 8        | NeuAc $\alpha$ (2-3)Gal $\beta$ (1-4)GlcNAc $\beta$ (1-3)Gal $\beta$ (1-4)GlcNAc $\beta$ -ethyl-NH <sub>2</sub>                                      |  |
| 9        | NeuAc $\alpha$ (2-3)Gal $\beta$ (1-4)GlcNAc $\beta$ (1-3)Gal $\beta$ (1-4)GlcNAc $\beta$ (1-3)Gal $\beta$ (1-4)GlcNAc $\beta$ -ethyl-NH <sub>2</sub> |  |
| 10       | NeuAc $\alpha$ (2-3)GalNAc $\beta$ (1-4)GlcNAc $\beta$ -ethyl-NH <sub>2</sub>                                                                        |  |
| 11       | NeuAc $\alpha$ (2-3)Gal $\beta$ (1-4)6-O-sulfo-GlcNAc $\beta$ -propyl-NH <sub>2</sub>                                                                |  |
| 12       | NeuAc $\alpha$ (2-3)Gal $\beta$ (1-4)[Fuc $\alpha$ (1-3)]-6-O-sulfo-GlcNAc $\beta$ -propyl-NH <sub>2</sub>                                           |  |
| 13       | NeuAc $\alpha$ (2-3)6-O-sulfo-Gal $\beta$ (1-4)GlcNAc $\beta$ -ethyl-NH <sub>2</sub>                                                                 |  |
| 14       | NeuAc $\alpha$ (2-3)6-O-sulfo-Gal $\beta$ (1-4)[Fuc $\alpha$ (1-3)]-GlcNAc $\beta$ -propyl-NH <sub>2</sub>                                           |  |
| 15       | NeuAc $\alpha$ (2-3)Gal $\beta$ (1-3)6-O-sulfo-GlcNAc $\beta$ -propyl-NH <sub>2</sub>                                                                |  |

|    |                                                                                                                                                                                                                   |  |
|----|-------------------------------------------------------------------------------------------------------------------------------------------------------------------------------------------------------------------|--|
| 16 | NeuAc $\alpha$ (2-3)Gal $\beta$ (1-4)Glc $\beta$ -ethyl-NH2                                                                                                                                                       |  |
| 17 | NeuAc $\alpha$ (2-3)Gal $\beta$ (1-4)GlcNAc $\beta$ -ethyl-NH2                                                                                                                                                    |  |
| 18 | NeuAc $\alpha$ (2-3)Gal $\beta$ (1-4)GlcNAc $\beta$ (1-3)Gal $\beta$ (1-4)GlcNAc $\beta$ -ethyl-NH2                                                                                                               |  |
| 19 | NeuAc $\alpha$ (2-3)Gal $\beta$ (1-4)GlcNAc $\beta$ (1-3)Gal $\beta$ (1-4)GlcNAc $\beta$ (1-3)Gal $\beta$ (1-4)GlcNAc $\beta$ -ethyl-NH2                                                                          |  |
| 20 | NeuAc $\alpha$ (2-3)GalNAc $\beta$ (1-4)GlcNAc $\beta$ -ethyl-NH2                                                                                                                                                 |  |
| 21 | NeuAc $\alpha$ (2-3)Gal $\beta$ (1-3)GlcNAc $\beta$ -ethyl-NH2                                                                                                                                                    |  |
| 22 | NeuAc $\alpha$ (2-3)Gal $\beta$ (1-3)GlcNAc $\beta$ (1-3)Gal $\beta$ (1-4)GlcNAc $\beta$ -ethyl-NH2                                                                                                               |  |
| 23 | NeuAc $\alpha$ (2-3)Gal $\beta$ (1-3)GlcNAc $\beta$ (1-3)Gal $\beta$ (1-3)GlcNAc $\beta$ -ethyl-NH2                                                                                                               |  |
| 24 | NeuAc $\alpha$ (2-3)Gal $\beta$ (1-3)GalNAc $\beta$ (1-3)Gal $\alpha$ (1-4)Gal $\beta$ (1-4)Glc $\beta$ -ethyl-NH2                                                                                                |  |
| 25 | NeuAc $\alpha$ (2-3)Gal $\beta$ (1-3)GalNAc $\alpha$ -Thr-NH2                                                                                                                                                     |  |
| 26 | NeuAc $\alpha$ (2-3)Gal $\beta$ (1-4)GlcNAc $\beta$ (1-3)Gal $\beta$ (1-3)GalNAc $\alpha$ -Thr-NH2                                                                                                                |  |
| 27 | NeuAc $\alpha$ (2-3)Gal $\beta$ (1-4)GlcNAc $\beta$ (1-3)Gal $\beta$ (1-4)GlcNAc $\beta$ (1-3)Gal $\beta$ (1-3)GalNAc $\alpha$ -Thr-NH2                                                                           |  |
| 28 | NeuAc $\alpha$ (2-3)Gal $\beta$ (1-4)GlcNAc $\beta$ (1-3)Gal $\beta$ (1-4)GlcNAc $\beta$ (1-3)Gal $\beta$ (1-4)GlcNAc $\beta$ (1-3)Gal $\beta$ (1-3)GalNAc $\alpha$ -Thr-NH2                                      |  |
| 29 | NeuAc $\alpha$ (2-3)Gal $\beta$ (1-4)GlcNAc $\beta$ (1-3)Gal $\beta$ (1-4)GlcNAc $\beta$ (1-3)Gal $\beta$ (1-4)GlcNAc $\beta$ (1-3)Gal $\beta$ (1-4)GlcNAc $\beta$ (1-3)Gal $\beta$ (1-3)GalNAc $\alpha$ -Thr-NH2 |  |
| 30 | NeuAc $\alpha$ (2-3)Gal $\beta$ (1-4)GlcNAc $\beta$ (1-3)Gal $\beta$ (1-4)GlcNAc $\beta$ (1-3)Gal $\beta$ (1-4)GlcNAc $\beta$ (1-3)Gal $\beta$ (1-4)GlcNAc $\beta$ (1-3)Gal $\beta$ (1-3)GalNAc $\alpha$ -Thr-NH2 |  |
| 31 | NeuAc $\alpha$ (2-3)Gal $\beta$ (1-3)[GlcNAc $\beta$ (1-6)]-GalNAc $\alpha$ -Thr-NH2                                                                                                                              |  |
| 32 | NeuAc $\alpha$ (2-3)Gal $\beta$ (1-4)GlcNAc $\beta$ (1-6)[Gal $\beta$ (1-3)]-GalNAc $\alpha$ -Thr-NH2                                                                                                             |  |





|    |                                                                                                                                              |  |
|----|----------------------------------------------------------------------------------------------------------------------------------------------|--|
| 66 | Gn/3'SLN/3'SLN-TriN                                                                                                                          |  |
| 67 | NeuAcα(2-3)[GalNAcβ(1-4)]-Galβ(1-4)GlcNAcβ-ethyl-NH2                                                                                         |  |
| 68 | NeuAcα(2-6)Galβ(1-4)(6S)GlcNAcβ-ethyl-NH2                                                                                                    |  |
| 69 | NeuAcα(2-6)Galβ(1-4)6-O-sulfo-GlcNAcβ-propyl-NH2                                                                                             |  |
| 70 | NeuAcα(2-6)Galβ(1-4)Glcβ-ethyl-NH2                                                                                                           |  |
| 71 | NeuAcα(2-6)Galβ(1-4)GlcNAcβ-ethyl-NH2                                                                                                        |  |
| 72 | NeuAcα(2-6)Galβ(1-4)GlcNAcβ(1-3)Galβ(1-4)GlcNAcβ-ethyl-NH2                                                                                   |  |
| 73 | NeuAcα(2-6)Galβ(1-4)GlcNAcβ(1-3)Galβ(1-4)GlcNAcβ(1-3)Galβ(1-4)GlcNAcβ-ethyl-NH2                                                              |  |
| 74 | NeuAcα(2-6)GalNAcβ(1-4)GlcNAcβ-ethyl-NH2                                                                                                     |  |
| 75 | NeuAcα(2-6)Galβ(1-4)GlcNAcβ(1-3)Galβ(1-3)GalNAcα-Thr-NH2                                                                                     |  |
| 76 | NeuAcα(2-6)Galβ(1-4)GlcNAcβ(1-3)Galβ(1-4)GlcNAcβ(1-3)Galβ(1-3)GalNAcα-Thr-NH2                                                                |  |
| 77 | NeuAcα(2-6)Galβ(1-4)GlcNAcβ(1-3)Galβ(1-4)GlcNAcβ(1-3)Galβ(1-4)GlcNAcβ(1-3)Galβ(1-3)GalNAcα-Thr-NH2                                           |  |
| 78 | NeuAcα(2-6)Galβ(1-4)GlcNAcβ(1-3)Galβ(1-4)GlcNAcβ(1-3)Galβ(1-4)GlcNAcβ(1-3)Galβ(1-4)GlcNAcβ(1-3)Galβ(1-3)GalNAcα-Thr-NH2                      |  |
| 79 | NeuAcα(2-6)Galβ(1-4)GlcNAcβ(1-3)Galβ(1-4)GlcNAcβ(1-3)Galβ(1-4)GlcNAcβ(1-3)Galβ(1-4)GlcNAcβ(1-3)Galβ(1-4)GlcNAcβ(1-3)Galβ(1-3)GalNAcα-Thr-NH2 |  |
| 80 | NeuAcα(2-6)Galβ(1-4)GlcNAcβ(1-6)[Galβ(1-3)]-GalNAcα-Thr-NH2                                                                                  |  |
| 81 | NeuAcα(2-6)Galβ(1-4)GlcNAcβ(1-3)Galβ(1-4)GlcNAcβ(1-6)[Galβ(1-3)]-GalNAcα-Thr-NH2                                                             |  |





|     |                                                                                                                                                                                                                                                                                                                                                                                                                                                                                                                                                                                                                                                                                                                                                                                                                                                                                                                                                                                                                                                           |  |
|-----|-----------------------------------------------------------------------------------------------------------------------------------------------------------------------------------------------------------------------------------------------------------------------------------------------------------------------------------------------------------------------------------------------------------------------------------------------------------------------------------------------------------------------------------------------------------------------------------------------------------------------------------------------------------------------------------------------------------------------------------------------------------------------------------------------------------------------------------------------------------------------------------------------------------------------------------------------------------------------------------------------------------------------------------------------------------|--|
| 116 | <p>NeuAc<math>\alpha</math>(2-6)Gal<math>\beta</math>(1-4)GlcNAc<math>\beta</math>(1-3)Gal<math>\beta</math>(1-4)GlcNAc<math>\beta</math>(1-3)Gal<math>\beta</math>(1-4)GlcNAc<math>\beta</math>(1-3)Gal<math>\beta</math>(1-4)GlcNAc<math>\beta</math>(1-2)Man<math>\alpha</math>(1-3){NeuAc<math>\alpha</math>(2-6)Gal<math>\beta</math>(1-4)GlcNAc<math>\beta</math>(1-3)Gal<math>\beta</math>(1-4)GlcNAc<math>\beta</math>(1-3)Gal<math>\beta</math>(1-4)GlcNAc<math>\beta</math>(1-3)Gal<math>\beta</math>(1-4)GlcNAc<math>\beta</math>(1-2)}[NeuAc<math>\alpha</math>(2-6)Gal<math>\beta</math>(1-4)GlcNAc<math>\beta</math>(1-3)Gal<math>\beta</math>(1-4)GlcNAc<math>\beta</math>(1-3)Gal<math>\beta</math>(1-4)GlcNAc<math>\beta</math>(1-3)Gal<math>\beta</math>(1-4)GlcNAc<math>\beta</math>(1-3)Gal<math>\beta</math>(1-4)GlcNAc<math>\beta</math>(1-6)Man<math>\alpha</math>(1-6)]-Man<math>\beta</math>(1-4)GlcNAc<math>\beta</math>(1-4)[Fuc<math>\alpha</math>(1-6)]-GlcNAc<math>\beta</math>-(Lys-Val-Ala)Asn-Lys-Thr-NH<sub>2</sub></p> |  |
| 117 | 6'SLNLN/6'SLN/6'SLN-TriN                                                                                                                                                                                                                                                                                                                                                                                                                                                                                                                                                                                                                                                                                                                                                                                                                                                                                                                                                                                                                                  |  |
| 118 | 6'SLN/LeX/LeX-TriN                                                                                                                                                                                                                                                                                                                                                                                                                                                                                                                                                                                                                                                                                                                                                                                                                                                                                                                                                                                                                                        |  |
| 119 | 6'SLNLN/LeX/LeX-TriN                                                                                                                                                                                                                                                                                                                                                                                                                                                                                                                                                                                                                                                                                                                                                                                                                                                                                                                                                                                                                                      |  |
