# Supplementary material
Source: PubMed Central journal article supplement (PMC6908751)
Supplement: NIHMS1543277-supplement-2.pdf [file NIHMS1543277-supplement-2.pdf]

# **Structural basis of protection against H7N9 influenza virus by human anti-N9 neuraminidase antibodies**

Xueyong Zhu<sup>1#</sup>, Hannah L. Turner<sup>1#</sup>, Shanshan Lang<sup>1</sup>, Ryan McBride<sup>2</sup>, Sandhya Bangaru<sup>3</sup>, Iuliia M. Gilchuk<sup>3</sup>, Wenli Yu<sup>1</sup>, James C. Paulson<sup>2</sup>, James E. Crowe, Jr.<sup>3,4,5</sup>, Andrew B. Ward<sup>1\*</sup>, Ian A. Wilson<sup>1,6\*</sup>

<sup>1</sup>Department of Integrative Structural and Computational Biology, The Scripps Research Institute, La Jolla, CA 92037, USA.

<sup>2</sup>Departments of Molecular Medicine, and Immunology and Microbiology, The Scripps Research Institute, La Jolla, CA, 92037, USA.

<sup>3</sup>Vanderbilt Vaccine Center, Vanderbilt University Medical Center, Nashville, TN, 37232, USA.

<sup>4</sup>Department of Pathology, Microbiology and Immunology, Vanderbilt, University Medical Center, Nashville, TN, 37232, USA.

<sup>5</sup>Department of Pediatrics, Vanderbilt University Medical Center, Nashville, TN, 37232, USA.

<sup>6</sup>Skaggs Institute for Chemical Biology, The Scripps Research Institute, La Jolla, CA, 92037, USA

# These authors contributed equally to this work.

\* Correspondence: wilson@scripps.edu (I.A.W.); andrew@scripps.edu (A.B.W.)

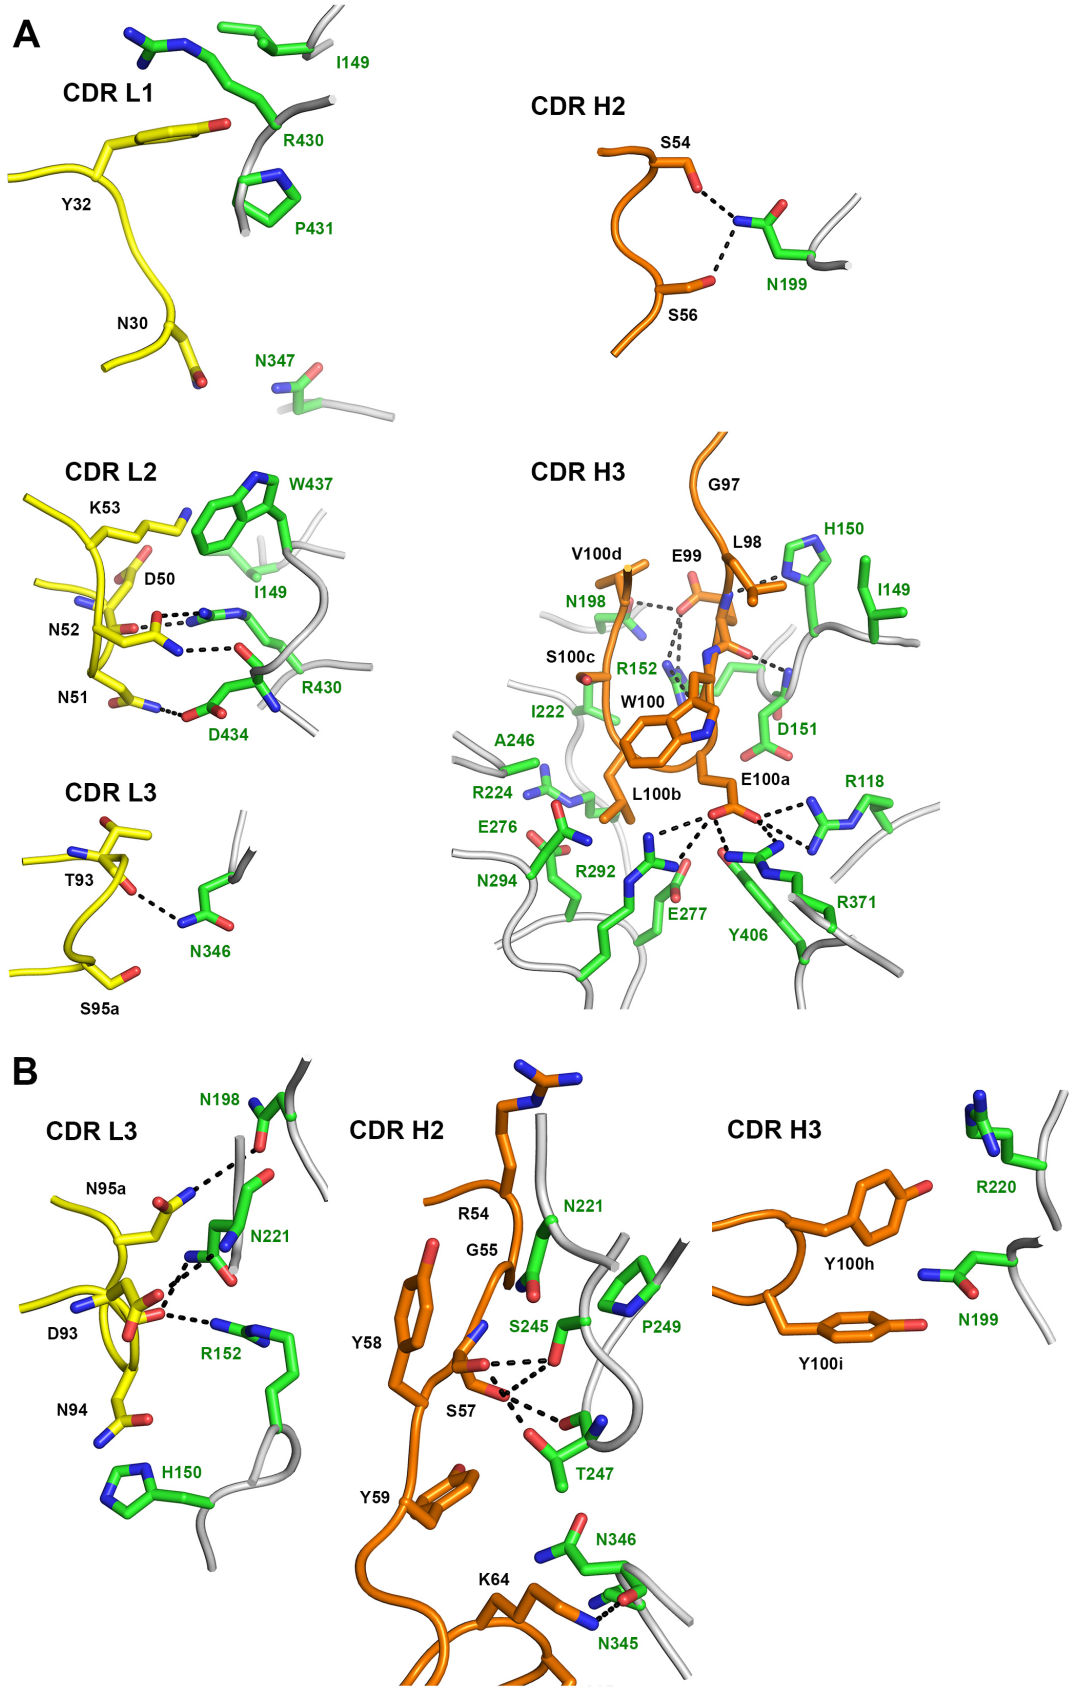

**Figure S1. X-ray and cryo-EM structures of NA-45 and NA-73 Fabs with N9 NAs. Related to Figures 2, 3, 6.**

(A) Interaction of Sh2 N9 Y169aH NA mutant with NA-45 Fab CDRs from the crystal structure of the Fab-NA complex at 2.3 Å resolution. NA-45 light chain is shown in yellow carbon atoms, and heavy chain in orange carbon atoms. The NA side-chains are shown in green carbon atoms. Hydrogen bonds or salt bridges are in black dotted lines.

(B) Interaction of Sh2 N9 NA with NA-73 Fab CDRs from the cryo-EM structure of the Fab-NA complex at 3.2 Å resolution. NA-73 light chain is shown in yellow carbon atoms, and heavy chain in orange carbon atoms. The NA side-chains are shown in green carbon atoms. Hydrogen bonds or salt bridges are in black dotted lines.

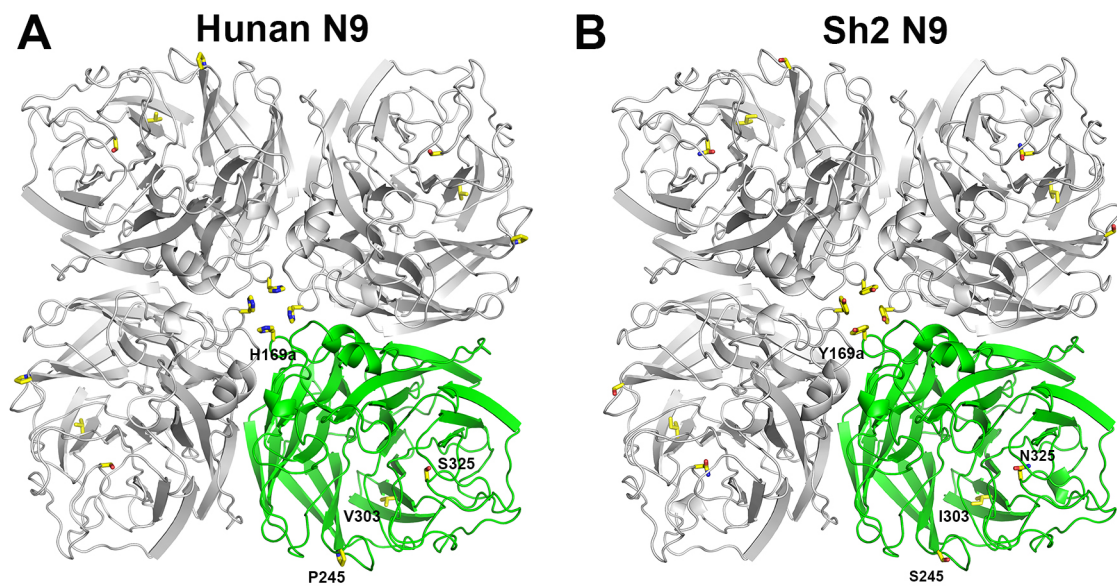

**Fig. S2. Structural comparison of the NA ectodomain of Hunan N9 from its complex with NA-45 (A) and the *apo* Sh2 N9 NA (PDB code 5L14) (B). Related to Figures 1, 2, 3. The NA tetramer is viewed from above the viral surface and consists of four identical monomers in C4 symmetry. One monomer is colored in green. Four amino acid differences are found in the ectodomains of Hunan N9 and Sh2 N9 NA. The side-chains of these residues are shown in sticks.**

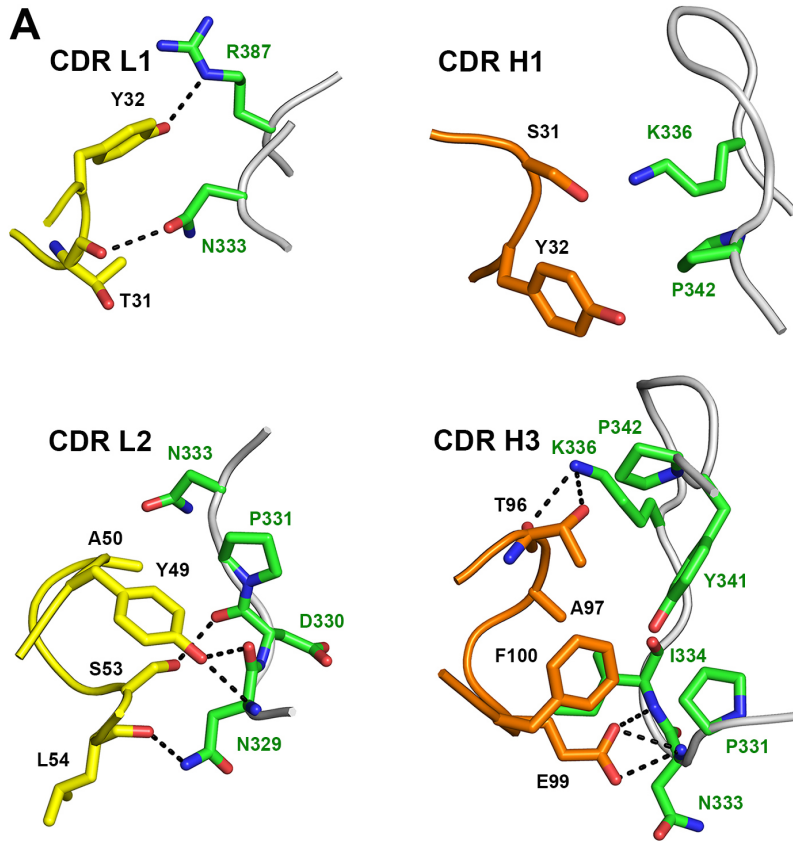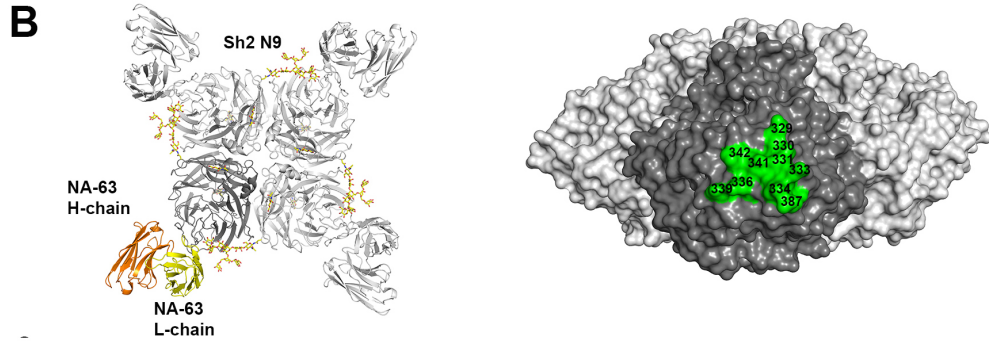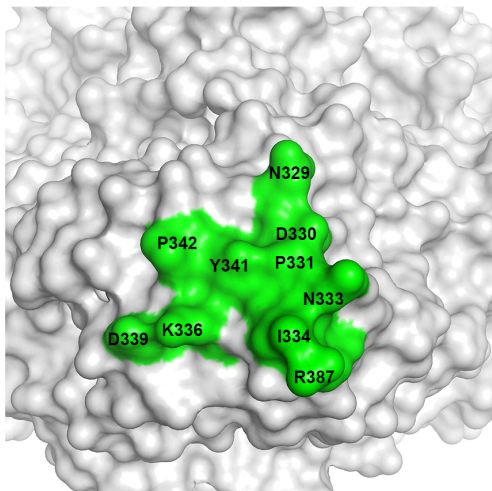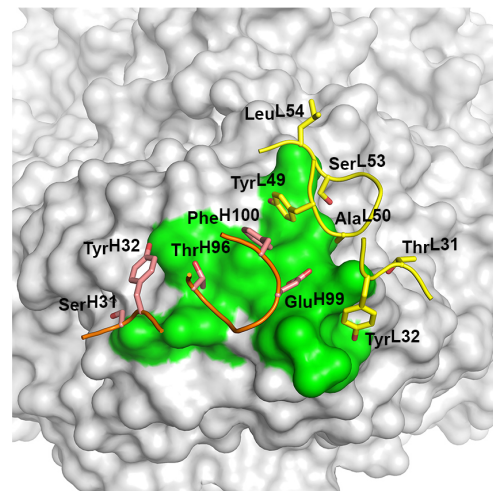

**Figure S3. Crystal and cryo-EM structures of NA-63 Fab with N9 NAs. Related to Figure 2.**

(A) Crystal structure at 2.8 Å resolution of NA-63 with Hunan N9 NA ectodomain illustrating the Fab CDR interactions with N9 NA. The NA-63 light chain is shown in yellow carbon atoms, and heavy chain in orange carbon atoms. The side-chains of NA are shown in green carbon atoms. Hydrogen bonds or salt bridges are in black dotted lines.

(B) Cryo-EM structure of NA-63 Fab in complex with Sh2 N9 NA ectodomain plus stalk at 3.1 Å resolution. (top left) Overall structure of antibody NA-63 Fab in complex with Sh2 N9 NA. (top right) The epitope of NA-63 is mapped onto Sh2 N9 NA. (bottom) The zoomed-in molecular surface depicting the epitope of NA-63 on Sh2 N9 NA (left). The key interacting residues on NA-63 are illustrated by the antibody side chains (sticks) on a backbone ribbon on the Sh2 N9 surface NA depicting the epitope (green) (right).

**A**

|       |    |                             |                    |                 |               |            |    |
|-------|----|-----------------------------|--------------------|-----------------|---------------|------------|----|
|       | 1  | 10                          | 20                 | 30              | 40            | 50         | 60 |
| NA-80 | VL | DIVMTQSPSSLSASVGRVTISCR     | <b>RASQSISSYLN</b> | WYQQKPGKAPKLLIY | <b>AASSLQ</b> | SGVPS      |    |
| NA-63 | VL | .....T.....T.....           |                    |                 |               | .....G.... |    |
|       |    | 61                          | 70                 | 80              | 90            | 100        |    |
| NA-80 | VL | RFSGSASGTDFTLTISLQPEDFATYYC | <b>QSYSAP-FT</b>   | FGPGTKVDIE      |               |            |    |
| NA-63 | VL | .....G.....                 |                    | T.LY...Q...LE.K |               |            |    |

  

|       |    |                                                           |                                   |                     |                    |     |     |
|-------|----|-----------------------------------------------------------|-----------------------------------|---------------------|--------------------|-----|-----|
|       | 1  | 10                                                        | 20                                | 30                  | 40                 | 50  | 59  |
| NA-80 | VH | QVQLVQSGAEVKRPGASVKVSKASGYTFI                             | <b>SYGIS</b>                      | WVRQAPGQGLEWMG      | <b>WISAYNGNTNY</b> |     |     |
| NA-63 | VH | E....E..GGLVQ..G.LRL..A...F..S..WM.....K..D.VAN.KQDGSEKY. |                                   |                     |                    |     |     |
|       |    | 60                                                        | 70                                | 80                  | 90                 | 100 | 110 |
| NA-80 | VH | <b>AQNLO</b>                                              | GRVTMTTDTSTSTAYMELRSLRSDDTAVYYCAR | <b>VIPGTAVDYFDY</b> | WGQGTLLVTVSS       |     |     |
| NA-63 | VH | VDSVK..F.ISRHNAKNSL.LQMN...AE.....SSTAAEFF---             |                                   |                     |                    |     |     |

**B**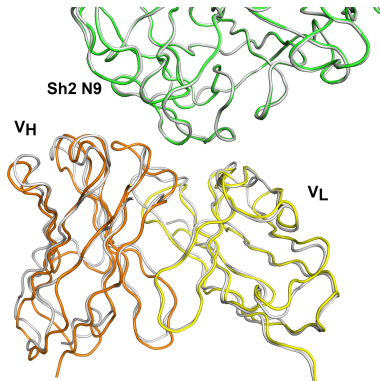**C**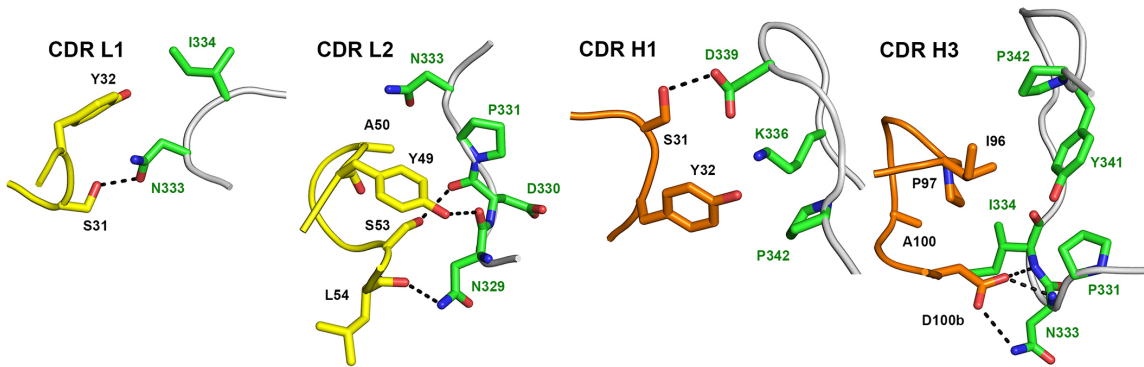**D**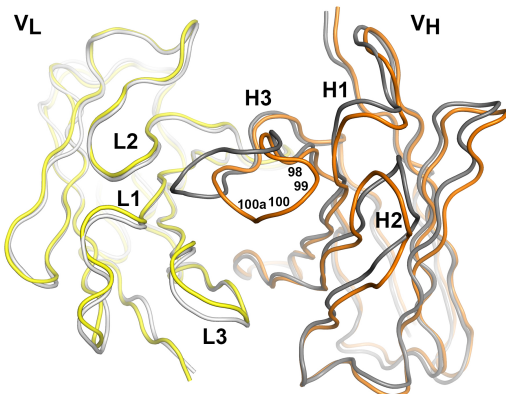

**Figure S4. Cryo-EM structure of NA-80 Fab with Sh2 N9 NA at 3.6 Å resolution, angle of approach versus NA-63, and comparison of *apo* and bound NA-80 Fab. Related to Figure 2.**

(A) Sequence comparison of NA-80 and NA-63 light and heavy chain variable domains with Kabat CDRs highlighted in cyan. Both antibodies use the IGKV1-39 germline, but IGHV1-18 for NA-80 and IGHV3-7 for NA-63. “-” indicates sequence deletion, “.” indicates sequence identity.

(B) NA-80 and NA-63 use an almost similar angle of approach when binding to Sh2 N9 NA. Structural comparison of NA-80 Fab (yellow and orange for light and heavy chains, respectively) in complex with Sh2 N9 NA (green) with NA-63 Fab (grey) in complex with Sh2 N9 NA (grey) after superimposition of Sh2 N9 NA structures in both complexes.

(C) Interaction of the NA-80 Fab CDRs with Sh2 N9 NA. The NA-80 light chain is shown in yellow carbon atoms, and heavy chain in orange carbon atoms. The side-chains of NA are shown in green carbon atoms. Hydrogen bonds or salt bridges are in black dotted lines.

(D) Comparison of NA-80 Fab in its *apo* form (light grey and dark grey) and in its complex with Sh2 N9 NA (yellow and orange). Upon binding to Sh2 N9 NA, the CDR H3 makes large conformational changes from residues 98 to 100a.



**A**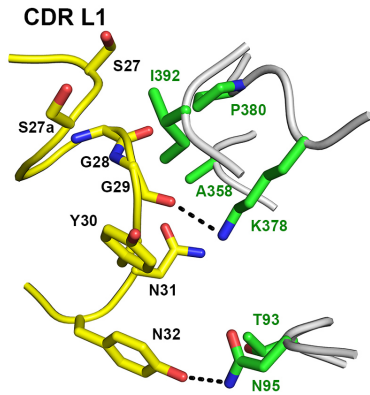**CDR H1**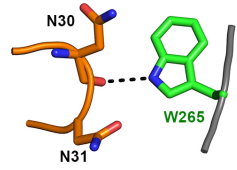**CDR H2**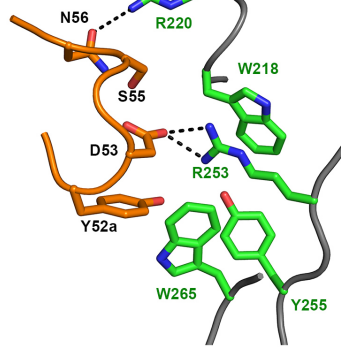**CDR L3**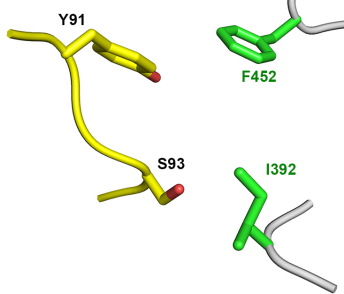**CDR H3**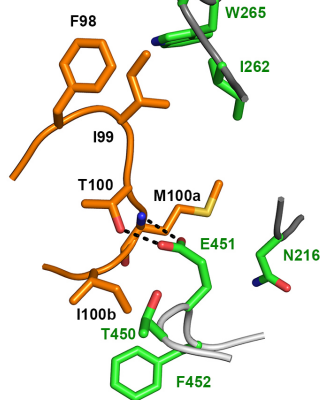**B**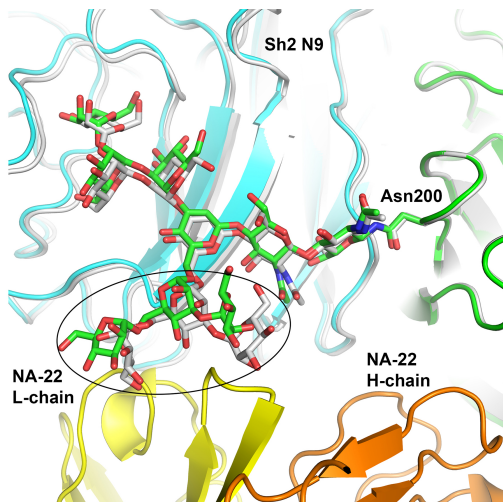**C**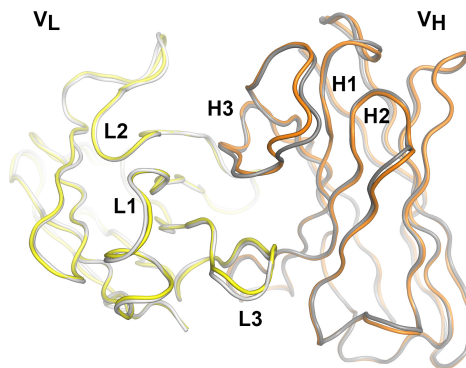

**Figure S5. Cryo-EM structure of NA-22 Fab with N9 NA at 3.0 Å resolution and comparison of *apo* and bound forms. Related to Figure 2.**

(A) Interaction of NA-22 Fab CDRs with Sh2 N9 NA. The NA-22 light chain is shown in yellow carbon atoms, and heavy chain in orange carbon atoms. NA-22 interacts with two NA monomers of the tetramer with one monomer shown in light grey backbone C<sub>α</sub> atoms and the other monomer in dark grey backbone C<sub>α</sub> atoms. The NA side-chains are shown in green carbon atoms. Hydrogen bonds or salt bridges are in black dotted lines.

(B) Structural comparison of NA-22 Fab in complex with Sh2 N9 NA (green and cyan for two adjacent protomers) with Sh2 N9 NA *apo* form (grey). Upon binding to Sh2 N9 NA, NA-22 interacts with the N-linked glycans from Asn200 of the N9 NA as indicated in highlight ellipse. The Asn200-linked glycan interacts with the adjacent N9 NA protomer in the tetramer.

(C) Comparison of NA-22 Fab in its *apo* form (light grey and dark grey) and in complex with Sh2 N9 NA (yellow and orange). No significant conformational changes of NA-22 are observed upon binding to Sh2 N9 NA.

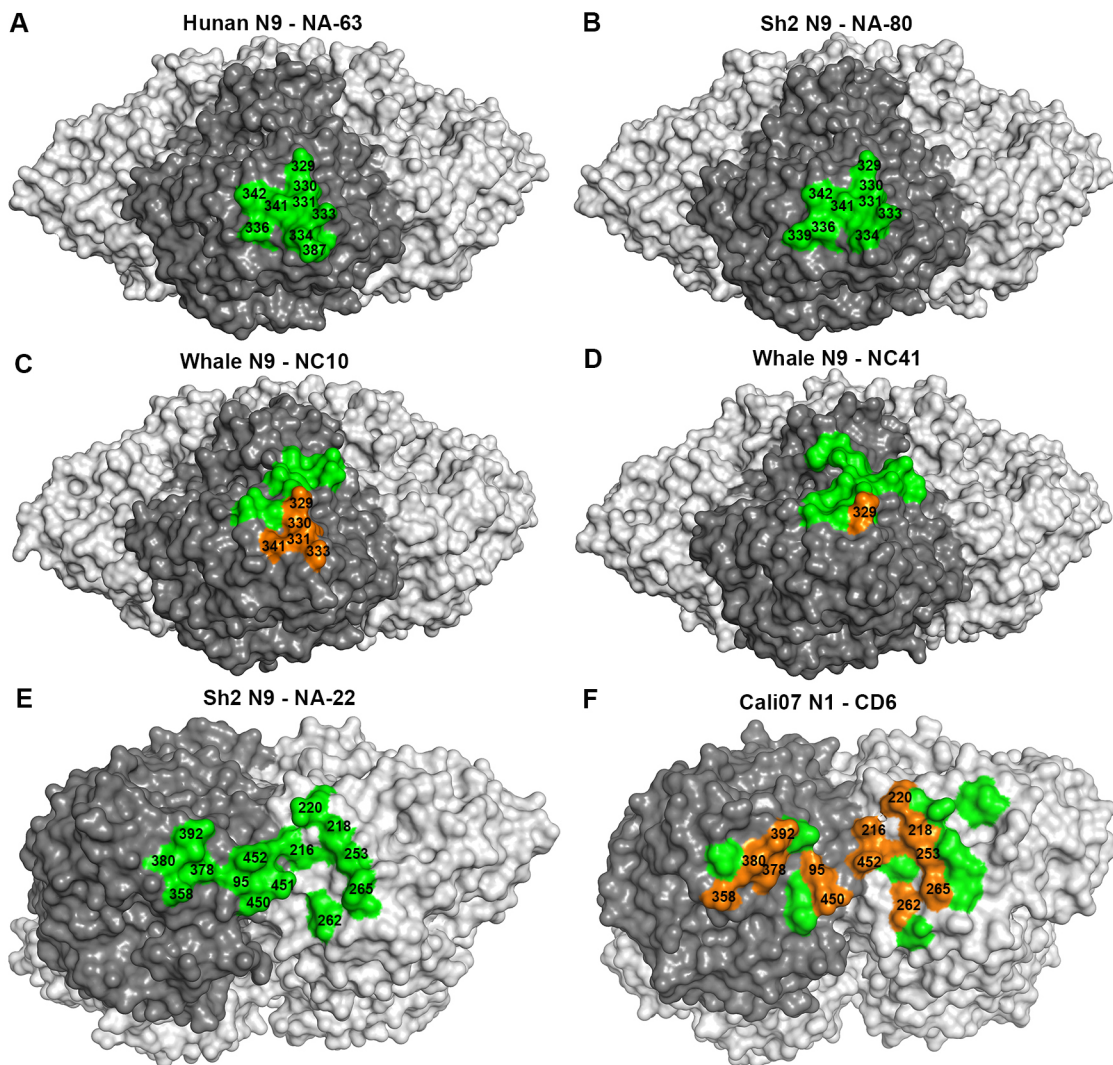

**Figure S6. Epitope comparison of human antibodies NA-80, NA-63, NA-22 to Sh2 N9 NA with mouse antibodies NC10 and NC41 to whale N9 (PDB codes 1NMB and 1NCD) and mouse antibody CD6 to Cali07 N1 NA (PDB code 4QNP). Related to Figures 2 and 6.**

- (A) The epitope of NA-63 is mapped onto Sh2 N9 (green).
- (B) The epitope of NA-80 is mapped onto Sh2 N9 (green).
- (C) The epitope of NC-10 is mapped onto whale N9 (green and orange) with the overlapped epitope residues with NA-63 or NA-80 shown in orange.
- (D) The epitope of NC-41 is mapped onto whale N9 (green and orange) with the overlapped epitope residues with NA-63 or NA-80 shown in orange.
- (E) The epitope of NA-22 is mapped onto Sh2 N9 NA (green).

(F) The epitope of CD6 is mapped onto Cali07 N1 NA (green and orange) with the overlapping epitope residues with NA-22 shown in orange.

**Table S1. Data collection and refinement statistics of crystal structures of SH2 N9 NA, NA antibodies and complexes. Related to Figures 1, 2, 3, 6.**

| Data set                             | Sh2 N9 Y169aH         | Sh2 N9 Y169aH<br>NA-45 Fab     | Hunan N9<br>NA-63 Fab           |
|--------------------------------------|-----------------------|--------------------------------|---------------------------------|
| <b>Data Collection</b>               |                       |                                |                                 |
| X-ray source                         | SSRL 12-2             | SSRL 12-2                      | APS 23ID-D                      |
| Space group                          | I432                  | P42 <sub>1</sub> 2             | P42 <sub>1</sub> 2              |
| Unit cell (Å)                        | $a = b = c = 182.2$   | $a = b = 161.3,$<br>$c = 87.4$ | $a = b = 164.6,$<br>$c = 192.6$ |
| Resolution (Å) <sup>a</sup>          | 43.0-1.12 (1.13-1.12) | 45.8-2.30 (2.35-2.30)          | 49.8-2.80 (2.85-2.80)           |
| Unique reflections                   | 194,141               | 51,133                         | 63,525                          |
| Redundancy <sup>a</sup>              | 22.3 (4.8)            | 6.6 (6.7)                      | 8.4 (7.7)                       |
| Average $I/\sigma(I)$ <sup>a</sup>   | 30.8 (1.1)            | 11.7 (2.1)                     | 10.0 (1.0)                      |
| Completeness <sup>a</sup>            | 99.9 (97.6)           | 98.3 (99.2)                    | 96.5 (78.4)                     |
| $R_{\text{sym}}$ <sup>a,b</sup>      | 0.10 (0.92)           | 0.12 (0.62)                    | 0.17 (0.98)                     |
| $R_{\text{pim}}$ <sup>a,b</sup>      | 0.02 (0.45)           | 0.05 (0.26)                    | 0.06 (0.35)                     |
| CC <sub>1/2</sub> <sup>a</sup>       | 0.999 (0.834)         | 0.997 (0.962)                  | 0.998 (0.853)                   |
| No. molecules per ASU <sup>c</sup>   | 1                     | 1                              | 2                               |
| <b>Refinement</b>                    |                       |                                |                                 |
| Reflections in refinement            | 194,104               | 51,085                         | 63,487                          |
| Refined residues                     | 389                   | 818                            | 1,634                           |
| Refined waters                       | 593                   | 590                            | 76                              |
| $R_{\text{cryst}}$ <sup>d</sup>      | 0.112                 | 0.156                          | 0.203                           |
| $R_{\text{free}}$ <sup>e</sup>       | 0.128                 | 0.197                          | 0.249                           |
| <b>B-values (Å<sup>2</sup>)</b>      |                       |                                |                                 |
| Protein                              | 11                    | 33                             | 77                              |
| Waters                               | 27                    | 36                             | 51                              |
| Wilson B-values (Å <sup>2</sup> )    | 7                     | 23                             | 59                              |
| Ramachandran values (%) <sup>f</sup> | 96.4, 0               | 95.3, 0.2                      | 94.3, 0.2                       |
| r.m.s.d. bond (Å)                    | 0.008                 | 0.007                          | 0.009                           |
| r.m.s.d. angle (deg.)                | 1.17                  | 0.94                           | 1.25                            |
| PDB codes                            | 6PZD                  | 6PZE                           | 6PZF                            |

<sup>a</sup> Parentheses denote outer-shell statistics.

<sup>b</sup>  $R_{\text{sym}} = \sum_{hkl} \sum_i |I_{hkl,i} - \langle I_{hkl} \rangle| / \sum_{hkl} \sum_i I_{hkl,i}$  and  $R_{\text{pim}} = \sum_{hkl} [1/(N-1)]^{1/2} \sum_i |I_{hkl,i} - \langle I_{hkl} \rangle| / \sum_{hkl} \sum_i I_{hkl,i}$ , where  $I_{hkl,i}$  is the scaled intensity of the  $i^{\text{th}}$  measurement of reflection  $h, k, l$ ,  $\langle I_{hkl} \rangle$  is the average intensity for that reflection, and  $N$  is the redundancy.  $R_{\text{pim}} = \sum_{hkl} (1/(n-1))^{1/2} \sum_i |I_{hkl,i} - \langle I_{hkl} \rangle| / \sum_{hkl} \sum_i I_{hkl,i}$ , where  $n$  is the redundancy.

<sup>c</sup> No. molecules for complexes refers to number of NA protomers, or NA protomers plus antibody, per asymmetric unit (ASU).

<sup>d</sup>  $R_{\text{cryst}} = \sum_{hkl} |F_o - F_c| / \sum_{hkl} |F_o|$ , where  $F_o$  and  $F_c$  are the observed and calculated structure factors.

<sup>e</sup>  $R_{\text{free}}$  was calculated as for  $R_{\text{cryst}}$ , but on 5% of data excluded before refinement.

<sup>f</sup> The values are percentage of residues in the favored and outliers regions analyzed by MolProbity (Chen et al., 2010).

**Table S1. Data collection and refinement statistics - continued**

| Data set                                              | NA-80 Fab                                       | NA-22 Fab                                             |
|-------------------------------------------------------|-------------------------------------------------|-------------------------------------------------------|
| <b>Data Collection</b>                                |                                                 |                                                       |
| X-ray source                                          | SSRL 9-2                                        | SSRL 9-2                                              |
| Space group                                           | P3 <sub>2</sub> 21                              | P2 <sub>1</sub> 2 <sub>1</sub> 2 <sub>1</sub>         |
| Unit cell (Å)                                         | <i>a</i> = <i>b</i> = 102.8,<br><i>c</i> = 80.4 | <i>a</i> = 72.3, <i>b</i> = 74.5,<br><i>c</i> = 178.3 |
| Resolution (Å) <sup>a</sup>                           | 44.5-1.59 (1.62-1.59)                           | 44.8-2.30 (2.34-2.30)                                 |
| Unique reflections                                    | 66,498 (3,234)                                  | 43,271 (2,184)                                        |
| Redundancy <sup>a</sup>                               | 18.1 (7.2)                                      | 4.7 (4.4)                                             |
| Average <i>I</i> / $\sigma$ ( <i>I</i> ) <sup>a</sup> | 58.0 (1.3)                                      | 23.4 (2.2)                                            |
| Completeness <sup>a</sup>                             | 99.9 (98.3)                                     | 99.3 (99.7)                                           |
| <i>R</i> <sub>sym</sub> <sup>a,b</sup>                | 0.08 (0.90)                                     | 0.08 (0.48)                                           |
| <i>R</i> <sub>pim</sub> <sup>a,b</sup>                | 0.02 (0.35)                                     | 0.04 (0.25)                                           |
| CC <sub>1/2</sub> <sup>a</sup>                        | 0.999 (0.63)                                    | 0.996 (0.83)                                          |
| No. molecules per ASU <sup>c</sup>                    | 1                                               | 2                                                     |
| <b>Refinement</b>                                     |                                                 |                                                       |
| Reflections in refinement                             | 66,460                                          | 43,207                                                |
| Refined residues                                      | 451                                             | 872                                                   |
| Refined waters                                        | 446                                             | 341                                                   |
| <i>R</i> <sub>cryst</sub> <sup>d</sup>                | 0.168                                           | 0.193                                                 |
| <i>R</i> <sub>free</sub> <sup>e</sup>                 | 0.204                                           | 0.236                                                 |
| <i>B</i> -values (Å <sup>2</sup> )                    |                                                 |                                                       |
| Protein                                               | 38                                              | 46                                                    |
| Waters                                                | 44                                              | 47                                                    |
| Wilson <i>B</i> -values (Å <sup>2</sup> )             | 26                                              | 46                                                    |
| Ramachandran values (%) <sup>f</sup>                  | 97.9, 0.2                                       | 96.6, 0.2                                             |
| r.m.s.d. bond (Å)                                     | 0.010                                           | 0.005                                                 |
| r.m.s.d. angle (deg.)                                 | 1.06                                            | 0.79                                                  |
| PDB codes                                             | 6PZG                                            | 6PZH                                                  |

<sup>a</sup> Parentheses denote outer-shell statistics.

<sup>b</sup>  $R_{\text{sym}} = \sum_{hkl} \sum_i |I_{hkl,i} - \langle I_{hkl} \rangle| / \sum_{hkl} \sum_i I_{hkl,i}$  and  $R_{\text{pim}} = \sum_{hkl} [1/(N-1)]^{1/2} \sum_i |I_{hkl,i} - \langle I_{hkl} \rangle| / \sum_{hkl} \sum_i I_{hkl,i}$ , where  $I_{hkl,i}$  is the scaled intensity of the *i*<sup>th</sup> measurement of reflection *h, k, l*,  $\langle I_{hkl} \rangle$  is the average intensity for that reflection, and *N* is the redundancy.  $R_{\text{pim}} = \sum_{hkl} (1/(n-1))^{1/2} \sum_i |I_{hkl,i} - \langle I_{hkl} \rangle| / \sum_{hkl} \sum_i I_{hkl,i}$ , where *n* is the redundancy

<sup>c</sup> No. molecules for complexes refers to number of antibody Fabs per asymmetric unit (ASU).

<sup>d</sup>  $R_{\text{cryst}} = \sum_{hkl} |F_o - F_c| / \sum_{hkl} |F_o|$ , where  $F_o$  and  $F_c$  are the observed and calculated structure factors.

<sup>e</sup> *R*<sub>free</sub> was calculated as for *R*<sub>cryst</sub>, but on 5% of data excluded before refinement.

<sup>f</sup> The values are percentage of residues in the favored and outliers regions analyzed by MolProbity (Chen et al., 2010).

**Table S2. Data collection and refinement statistics of cryo-EM structures. Related to Figures 2 and 6.**

| <b>Data set</b>                                             | <b>Sh2 N9 NA<br/>NA-73 Fab</b> | <b>Sh2 N9 NA<br/>NA-63 Fab</b> | <b>Sh2 N9 NA<br/>NA-80 Fab</b> | <b>Sh2 N9 NA<br/>NA-22 Fab</b> |
|-------------------------------------------------------------|--------------------------------|--------------------------------|--------------------------------|--------------------------------|
| <b>Data Collection</b>                                      |                                |                                |                                |                                |
| Microscope                                                  | Thermo Fisher<br>Titan Krios   | Thermo Fisher<br>Titan Krios   | Thermo Fisher<br>Titan Krios   | Thermo Fisher<br>Titan Krios   |
| Voltage (kV)                                                | 300                            | 300                            | 300                            | 300                            |
| Detector                                                    | Gatan K2<br>Summit             | Gatan K2<br>Summit             | Gatan K2<br>Summit             | Gatan K2<br>Summit             |
| Recording mode                                              | Counting                       | Counting                       | Counting                       | Counting                       |
| Nominal magnification                                       | 29,000                         | 29,000                         | 29,000                         | 29,000                         |
| Movie micrograph pixel size (Å)                             | 1.03                           | 1.03                           | 1.03                           | 1.03                           |
| Dose rate (e <sup>-</sup> /[(camera pixel) <sup>2</sup> s]) | 6.421                          | 4.406                          | 4.053                          | 5.111                          |
| Number of frames per movie micrograph                       | 33                             | 48                             | 52                             | 42                             |
| Frame exposure time (ms)                                    | 250                            | 250                            | 250                            | 250                            |
| Movie micrograph exposure time (s)                          | 8.25                           | 12                             | 13                             | 10.5                           |
| Total dose (e <sup>-</sup> /Å <sup>2</sup> )                | 50                             | 50                             | 50                             | 50                             |
| Defocus range (µm)                                          | -0.5 to -1.5                   | -0.5 to -1.5                   | -0.8 to -2.0                   | -1.2 to -2.0                   |
| <b>EM data processing</b>                                   |                                |                                |                                |                                |
| Number of movie micrographs                                 | 1,355                          | 916                            | 946                            | 823                            |
| Number of molecular projection images<br>in map             | 157,751                        | 91,117                         | 11,240                         | 20,922                         |
| Symmetry                                                    | C4                             | C4                             | C4                             | C4                             |
| Map resolution (FSC 0.143; Å)                               | 3.17                           | 3.11                           | 3.60                           | 3.00                           |
| Local resolution range (Å)                                  | 2.2-3.4                        | 2.3-3.2                        | 2.3-6.5                        | 2.9-3.5                        |
| Map sharpening B-factor (Å <sup>2</sup> )                   | -161                           | -149                           | -112                           | -103                           |
| <b>Structure building and validation</b>                    |                                |                                |                                |                                |
| Number of atoms in deposited model                          |                                |                                |                                |                                |
| NA (protomer)                                               | 3,051                          | 3,068                          | 3,054                          | 3,068                          |
| Fab variable region                                         | 1,801                          | 1,733                          | 1,752                          | 1,742                          |
| Glycans                                                     | 147                            | 119                            | 147                            | 133                            |
| MolProbity score                                            | 1.05                           | 0.80                           | 1.05                           | 1.19                           |
| Clash score                                                 | 1.39                           | 0.42                           | 1.48                           | 2.63                           |
| Map correlation coefficient                                 | 0.90                           | 0.87                           | 0.86                           | 0.88                           |
| EMRinger score                                              | 4.89                           | 4.87                           | 4.03                           | 5.80                           |
| r.m.s.d. bond (Å)                                           | 0.024                          | 0.022                          | 0.020                          | 0.020                          |
| r.m.s.d. angle (deg.)                                       | 1.89                           | 1.82                           | 1.92                           | 1.76                           |
| Ramachandran values (%) <sup>a</sup>                        | 97.0, 0.3                      | 97.2, 0.5                      | 97.1, 0.2                      | 97.2, 0                        |
| Side-chain rotamer outliers(%)                              | 0                              | 0                              | 0                              | 0                              |
| PDB codes                                                   | 6PZY                           | 6U02                           | 6PZZ                           | 6PZW                           |

<sup>a</sup>Values are percentage of residues in the favored and outliers regions analyzed by MolProbity (Chen et al., 2010).



**Table S3. Sequence conservation of NA-45 epitope by influenza NA subtype.**

Related to Figures 2, 3, 6.

| NA residue number | Sh2 N9   | Hunan N9 | A Group 1                             |                |             |               | A Group 2      |             |               |             |             | B               |
|-------------------|----------|----------|---------------------------------------|----------------|-------------|---------------|----------------|-------------|---------------|-------------|-------------|-----------------|
|                   |          |          | N1<br>(9,744) <sup>a</sup>            | N4<br>(149)    | N5<br>(237) | N8<br>(1,290) | N2<br>(12,826) | N3<br>(772) | N6<br>(1,218) | N7<br>(473) | N9<br>(587) | B NA<br>(3,469) |
| <b>118</b>        | <b>R</b> | <b>R</b> | R <sup>b</sup><br>(99.9) <sup>c</sup> | R<br>(99.3)    | R<br>(99.6) | R<br>(99.8)   | R<br>(100)     | R<br>(100)  | R<br>(100)    | R<br>(100)  | R<br>(99.8) | R<br>(100)      |
| <b>149</b>        | <b>I</b> | <b>I</b> | V<br>(54.4)                           | V<br>(98.7)    | V<br>(99.6) | V<br>(95.5)   | V<br>(65.3)    | I<br>(90.3) | I<br>(99.2)   | I<br>(97.3) | I<br>(99.5) | R<br>(99.9)     |
| <b>150</b>        | <b>H</b> | <b>H</b> | K<br>(99.5)                           | K<br>(100)     | K<br>(99.2) | K<br>(99.5)   | H<br>(65.9)    | K<br>(98.4) | H<br>(99.3)   | H<br>(98.7) | H<br>(100)  | E<br>(53.3)     |
| <b>151</b>        | <b>D</b> | <b>D</b> | D<br>(99.2)                           | D<br>(100)     | D<br>(99.6) | D<br>(99.9)   | D<br>(93.5)    | D<br>(99.1) | D<br>(99.9)   | D<br>(100)  | D<br>(99.7) | D<br>(99.4)     |
| <b>152</b>        | <b>R</b> | <b>R</b> | R<br>(100)                            | R<br>(100)     | R<br>(99.6) | R<br>(99.8)   | R<br>(99.9)    | R<br>(99.7) | R<br>(99.8)   | R<br>(99.8) | R<br>(99.3) | R<br>(99.9)     |
| <b>198</b>        | <b>N</b> | <b>N</b> | D<br>(99.5)                           | D<br>(100)     | D<br>(99.6) | D<br>(99.9)   | D<br>(99.6)    | D<br>(99.4) | N<br>(97.8)   | N<br>(100)  | N<br>(99.5) | D<br>(99.4)     |
| <b>199</b>        | <b>N</b> | <b>N</b> | N<br>(81.7)                           | A<br>(56.4)    | D<br>(98.7) | A<br>(66.0)   | K<br>(59.3)    | N<br>(97.8) | N<br>(98.1)   | D<br>(88.4) | N<br>(99.8) | S<br>(52.7)     |
| <b>222</b>        | <b>I</b> | <b>I</b> | I<br>(99.2)                           | I<br>(99.3)    | I<br>(99.6) | I<br>(99.7)   | I<br>(99.3)    | I<br>(99.4) | I<br>(99.3)   | I<br>(99.8) | I<br>(100)  | I<br>(99.5)     |
| <b>224</b>        | <b>R</b> | <b>R</b> | R<br>(99.9)                           | R<br>(100)     | R<br>(99.2) | R<br>(99.9)   | R<br>(99.9)    | R<br>(99.2) | R<br>(99.5)   | R<br>(100)  | R<br>(100)  | R<br>(99.8)     |
| <b>246</b>        | <b>A</b> | <b>A</b> | S<br>(99.2)                           | S<br>(99.3)    | A<br>(99.6) | A<br>(99.5)   | A<br>(99.8)    | A<br>(99.5) | A<br>(99.5)   | A<br>(100)  | A<br>(99.5) | A<br>(99.9)     |
| <b>276</b>        | <b>E</b> | <b>E</b> | E<br>(99.9)                           | E<br>(100)     | E<br>(99.6) | E<br>(99.9)   | E<br>(99.9)    | E<br>(99.6) | E<br>(99.6)   | E<br>(100)  | E<br>(100)  | E<br>(100)      |
| <b>277</b>        | <b>E</b> | <b>E</b> | E<br>(100)                            | E<br>(100)     | E<br>(99.6) | E<br>(100)    | E<br>(100)     | E<br>(99.6) | E<br>(99.6)   | E<br>(100)  | E<br>(100)  | E<br>(100)      |
| <b>292</b>        | <b>R</b> | <b>R</b> | R<br>(99.9)                           | R<br>(100)     | R<br>(99.6) | R<br>(99.9)   | R<br>(99.9)    | R<br>(99.6) | R<br>(99.9)   | R<br>(100)  | R<br>(98.8) | R<br>(100)      |
| <b>294</b>        | <b>N</b> | <b>N</b> | N<br>(99.8)                           | N<br>(100)     | N<br>(99.2) | N<br>(99.9)   | N<br>(99.9)    | N<br>(99.6) | N<br>(99.8)   | N<br>(100)  | N<br>(100)  | N<br>(99.9)     |
| <b>346</b>        | <b>N</b> | <b>N</b> | A<br>(98.1)                           | R<br>(100)     | N<br>(99.6) | -             | G<br>(66.8)    | G<br>(88.2) | D<br>(99.8)   | A<br>(99.6) | N<br>(100)  | -               |
| <b>347</b>        | <b>N</b> | <b>N</b> | N<br>(66.2)                           | Y<br>(100)     | Y<br>(100)  | Y<br>(100)    | H<br>(73.1)    | P<br>(89.5) | P<br>(99.8)   | P<br>(99.6) | N<br>(99.3) | G<br>(99.7)     |
| <b>371</b>        | <b>R</b> | <b>R</b> | R<br>(99.9)                           | R<br>(100)     | R<br>(100)  | R<br>(100)    | R<br>(99.9)    | R<br>(100)  | R<br>(100)    | R<br>(100)  | R<br>(100)  | R<br>(99.9)     |
| <b>406</b>        | <b>Y</b> | <b>Y</b> | Y<br>(99.9)                           | Y<br>(100)     | Y<br>(99.6) | Y<br>(99.9)   | Y<br>(99.9)    | Y<br>(100)  | Y<br>(100)    | Y<br>(100)  | Y<br>(100)  | Y<br>(99.9)     |
| <b>430</b>        | <b>R</b> | <b>R</b> | Q<br>(100)                            | I<br>(99.3)    | K<br>(98.3) | K<br>(90.6)   | R<br>(98.8)    | R<br>(86.9) | R<br>(98.4)   | R<br>(99.8) | R<br>(99.1) | G<br>(99.6)     |
| <b>431</b>        | <b>P</b> | <b>P</b> | P<br>(99.3)                           | T<br>(99.3)    | P<br>(99.6) | P<br>(100)    | K<br>(69.3)    | P<br>(99.7) | P<br>(100)    | P<br>(100)  | P<br>(100)  | G<br>(99.8)     |
| <b>434</b>        | <b>D</b> | <b>D</b> | N<br>(66.7)                           | - <sup>d</sup> | R<br>(97.0) | -             | T<br>(89.3)    | N<br>(99.5) | S<br>(95.6)   | A<br>(99.4) | D<br>(99.5) | -               |
| <b>437</b>        | <b>W</b> | <b>W</b> | I<br>(98.6)                           | I<br>(100)     | I<br>(100)  | I<br>(99.1)   | W<br>(57.6)    | S<br>(99.6) | L<br>(99.0)   | W<br>(97.0) | W<br>(99.5) | T<br>(99.7)     |

NA residues conserved in influenza A N1 to N9 and influenza B NA are highlighted in cyan.

<sup>a</sup> Number of non-redundant influenza NA sequences for subtype from the Influenza Virus Resource at the National Center for Biotechnology Information (NCBI) database (<https://www.ncbi.nlm.nih.gov/genomes/FLU/>) in Nov 28, 2018.

<sup>b</sup> Most common residue at position for subtype.

<sup>c</sup> Percent identity for most common residue.

<sup>d</sup> Sequence deletion as aligned to N2 NA.

**Table S4. Sequence conservation of NA-73, NA-63, NA-80, and NA-22 epitopes by influenza NA subtype. Related to Figures 2 and 6.**

(A) Sequence conservation of NA-73 epitope by NA subtype.

| NA residue number | Sh2 N9 | Hunan N9 | A Group 1                          |          |          |                | A Group 2   |          |            |          |          | B            |
|-------------------|--------|----------|------------------------------------|----------|----------|----------------|-------------|----------|------------|----------|----------|--------------|
|                   |        |          | N1 <sub>a</sub> (9,744)            | N4 (149) | N5 (237) | N8 (1,290)     | N2 (12,826) | N3 (772) | N6 (1,218) | N7 (473) | N9 (587) | B NA (3,469) |
| 150               | H      | H        | K <sup>b</sup> (99.5) <sup>c</sup> | K (100)  | K (99.2) | K (99.5)       | H (65.9)    | K (98.4) | H (99.3)   | H (98.7) | H (100)  | E (53.3)     |
| 152               | R      | R        | R (100)                            | R (100)  | R (99.6) | R (99.8)       | R (99.9)    | R (99.7) | R (99.8)   | R (99.8) | R (99.3) | R (99.9)     |
| 198               | N      | N        | D (99.5)                           | D (100)  | D (99.6) | D (99.9)       | D (99.6)    | D (99.4) | N (97.8)   | N (100)  | N (99.5) | D (99.4)     |
| 199               | N      | N        | N (81.7)                           | A (56.4) | D (98.7) | A (66.0)       | K (59.3)    | N (97.8) | N (98.1)   | D (88.4) | N (99.8) | S (52.7)     |
| 220               | R      | R        | N (85.0)                           | G (100)  | K (98.7) | G (99.7)       | K (80.5)    | K (74.9) | G (99.1)   | G (56.4) | R (98.1) | N (51.9)     |
| 221               | N      | N        | N (72.0)                           | N (100)  | Q (98.7) | D (97.8)       | N (50.6)    | D (90.2) | N (99.6)   | N (98.9) | N (99.8) | P (99.6)     |
| 245               | S      | P        | P (99.5)                           | P (100)  | P (99.6) | P (100)        | S (89.0)    | P (99.4) | P (99.4)   | S (96.8) | S (92.7) | G (100)      |
| 247               | T      | T        | N (59.7)                           | D (98.7) | N (92.4) | N (99.0)       | S (89.7)    | A (89.8) | N (99.0)   | S (96.0) | T (99.7) | D (77.5)     |
| 249               | P      | P        | Q (89.5)                           | Q (100)  | Q (99.6) | Q (99.9)       | K (73.1)    | S (88.2) | R (84.5)   | Q (99.6) | P (100)  | D (99.4)     |
| 345               | N      | N        | G (100)                            | G (100)  | N (95.8) | G (98.9)       | G (99.9)    | G (99.6) | P (99.7)   | G (98.7) | N (98.1) | D (77.5)     |
| 346               | N      | N        | A (98.1)                           | R (100)  | N (99.6) | - <sup>d</sup> | G (66.8)    | G (88.2) | D (99.8)   | A (99.6) | N (100)  | -            |

(B) Sequence conservation of NA-63 epitope by NA subtype.

| NA residue number | Sh2 N9 | Hunan N9 | A Group 1                          |          |          |            | A Group 2   |          |            |          |                                  | B            |
|-------------------|--------|----------|------------------------------------|----------|----------|------------|-------------|----------|------------|----------|----------------------------------|--------------|
|                   |        |          | N1 <sub>a</sub> (9,744)            | N4 (149) | N5 (237) | N8 (1,290) | N2 (12,826) | N3 (772) | N6 (1,218) | N7 (473) | N9 (587)                         | B NA (3,469) |
| 329               | N      | N        | N <sup>b</sup> (85.7) <sup>c</sup> | V (94.0) | Q (99.6) | E (99.6)   | N (59.0)    | A (80.6) | N (94.3)   | S (59.0) | N (99.0)                         | N (72.9)     |
| 330               | D      | D        | D (99.9)                           | D (100)  | D (100)  | D (100)    | D (99.9)    | D (99.6) | D (99.9)   | D (100)  | D (99.8)                         | D (100)      |
| 331               | P      | P        | G (55.2)                           | G (98.7) | S (79.3) | S (75.8)   | S (84.3)    | P (99.6) | P (99.8)   | K (98.5) | P (99.8)                         | G (100)      |
| 333               | N      | N        | - <sup>d</sup>                     | -        | F (100)  | F (100)    | S (99.8)    | S (99.6) | G (47.5)   | S (86.7) | N (48.9)<br>A (27.4)<br>T (21.8) | I (99.7)     |
| 334               | I      | I        | T (70.9)                           | T (98.0) | T (83.5) | T (89.1)   | S (91.2)    | T (97.5) | S (56.2)   | S (26.8) | V (57.9)<br>I (41.7)             | T (99.0)     |
| 336               | K      | K        | S (83.7)                           | S (100)  | S (100)  | S (100)    | H (54.0)    | S (99.4) | N (96.7)   | D (98.1) | K (99.3)                         | P (99.6)     |
| 341               | Y      | Y        | V (93.6)                           | V (64.4) | V (89.0) | M (79.4)   | N (99.9)    | S (99.2) | I (97.6)   | I (99.8) | Y (100)                          | G (100)      |
| 342               | P      | P        | S (68.8)                           | N (100)  | G (100)  | G (99.9)   | N (97.9)    | N (89.9) | T (97.5)   | T (99.6) | P (99.8)                         | D (77.5)     |
| 387               | R      | R        | -                                  | D (100)  | S (100)  | S (100)    | N (66.3)    | P (84.6) | Q (99.6)   | N (95.8) | R (98.3)                         | D (99.4)     |

(C) Sequence conservation of NA-80 epitope by NA subtype.

| NA residue number | Sh2 N9 | Hunan N9 | A Group 1                             |             |             |             | A Group 2   |             |             |             |                                           | B           |
|-------------------|--------|----------|---------------------------------------|-------------|-------------|-------------|-------------|-------------|-------------|-------------|-------------------------------------------|-------------|
|                   |        |          | N1 (9,744) <sup>a</sup>               | N4 (149)    | N5 (237)    | N8 (1,290)  | N2 (12,826) | N3 (772)    | N6 (1,218)  | N7 (473)    | N9 (587)                                  |             |
| 329               | N      | N        | N <sup>b</sup><br>(85.7) <sup>c</sup> | V<br>(94.0) | Q<br>(99.6) | E<br>(99.6) | N<br>(59.0) | A<br>(80.6) | N<br>(94.3) | S<br>(59.0) | N<br>(99.0)                               | N<br>(72.9) |
| 330               | D      | D        | D<br>(99.9)                           | D<br>(100)  | D<br>(100)  | D<br>(100)  | D<br>(99.9) | D<br>(99.6) | D<br>(99.9) | D<br>(100)  | D<br>(99.8)                               | D<br>(100)  |
| 331               | P      | P        | G<br>(55.2)                           | G<br>(98.7) | S<br>(79.3) | S<br>(75.8) | S<br>(84.3) | P<br>(99.6) | P<br>(99.8) | K<br>(98.5) | P<br>(99.8)                               | G<br>(100)  |
| 333               | N      | N        | - <sup>d</sup>                        | -           | F<br>(100)  | F<br>(100)  | S<br>(99.8) | S<br>(99.6) | G<br>(47.5) | S<br>(86.7) | N<br>(48.9)<br>A<br>(27.4)<br>T<br>(21.8) | I<br>(99.7) |
| 334               | I      | I        | T<br>(70.9)                           | T<br>(98.0) | T<br>(83.5) | T<br>(89.1) | S<br>(91.2) | T<br>(97.5) | S<br>(56.2) | S<br>(26.8) | V<br>(57.9)<br>I<br>(41.7)                | T<br>(99.0) |
| 336               | K      | K        | S<br>(83.7)                           | S<br>(100)  | S<br>(100)  | S<br>(100)  | H<br>(54.0) | S<br>(99.4) | N<br>(96.7) | D<br>(98.1) | K<br>(99.3)                               | P<br>(99.6) |
| 339               | D      | D        | G<br>(89.2)                           | S<br>(66.4) | N<br>(95.8) | S<br>(93.9) | D<br>(78.7) | S<br>(94.9) | A<br>(96.0) | N<br>(100)  | D<br>(98.3)                               | S<br>(99.5) |
| 341               | Y      | Y        | V<br>(93.6)                           | V<br>(64.4) | V<br>(89.0) | M<br>(79.5) | N<br>(99.9) | S<br>(99.2) | I<br>(97.6) | I<br>(99.8) | Y<br>(100)                                | G<br>(100)  |
| 342               | P      | P        | S<br>(68.8)                           | N<br>(100)  | G<br>(100)  | G<br>(99.9) | N<br>(97.9) | N<br>(89.9) | T<br>(97.5) | T<br>(99.6) | P<br>(99.8)                               | D<br>(77.5) |

(D) Sequence conservation of NA-22 epitope by NA subtype.

| NA residue number | Sh2 N9 | Hunan N9 | A Group 1                             |             |             |             | A Group 2   |             |             |             |                                           | B           |
|-------------------|--------|----------|---------------------------------------|-------------|-------------|-------------|-------------|-------------|-------------|-------------|-------------------------------------------|-------------|
|                   |        |          | N1 (9,744) <sup>a</sup>               | N4 (149)    | N5 (237)    | N8 (1,290)  | N2 (12,826) | N3 (772)    | N6 (1,218)  | N7 (473)    | N9 (587)                                  |             |
| 95                | N      | N        | S <sup>b</sup><br>(82.7) <sup>c</sup> | K<br>(56.4) | S<br>(99.6) | K<br>(81.7) | T<br>(96.1) | R<br>(89.2) | N<br>(99.2) | E<br>(98.9) | N<br>(99.8)                               | S<br>(99.7) |
| 216               | N      | N        | K<br>(99.5)                           | K<br>(99.3) | R<br>(99.6) | N<br>(98.8) | G<br>(58.5) | K<br>(98.7) | P<br>(50.5) | K<br>(98.5) | N<br>(99.5)                               | H<br>(99.7) |
| 218               | W      | W        | W<br>(99.9)                           | W<br>(100)  | W<br>(99.6) | W<br>(99.9) | W<br>(99.9) | W<br>(99.2) | W<br>(99.5) | W<br>(100)  | W<br>(100)                                | Y<br>(99.9) |
| 220               | R      | R        | N<br>(85.0)                           | G<br>(100)  | K<br>(98.7) | G<br>(99.7) | K<br>(80.5) | K<br>(74.9) | G<br>(99.1) | G<br>(56.4) | R<br>(98.1)                               | N<br>(51.9) |
| 253               | R      | R        | K<br>(98.2)                           | K<br>(100)  | K<br>(99.2) | R<br>(89.7) | K<br>(71.8) | R<br>(99.1) | K<br>(98.9) | K<br>(100)  | R<br>(100)                                | R<br>(99.9) |
| 262               | I      | I        | I<br>(55.9)                           | I<br>(99.3) | V<br>(99.6) | I<br>(88.4) | I<br>(98.4) | I<br>(72.3) | I<br>(95.8) | V<br>(87.7) | I<br>(97.8)                               | I<br>(99.7) |
| 265               | W      | W        | S<br>(99.0)                           | M<br>(56.4) | E<br>(99.6) | Q<br>(96.9) | I<br>(54.6) | Y<br>(95.7) | I<br>(91.7) | E<br>(100)  | W<br>(100)                                | E<br>(99.9) |
| 358               | A      | A        | N<br>(98.4)                           | D<br>(99.3) | N<br>(84.8) | N<br>(70.9) | N<br>(85.6) | N<br>(84.6) | E<br>(49.9) | D<br>(46.5) | G<br>(41.6)<br>A<br>(34.9)<br>V<br>(15.5) | I<br>(99.3) |
| 378               | K      | K        | W<br>(99.9)                           | W<br>(100)  | L<br>(96.6) | K<br>(79.0) | K<br>(76.6) | K<br>(99.1) | K<br>(98.9) | K<br>(99.8) | K<br>(99.8)                               | V<br>(99.6) |
| 380               | P      | P        | P<br>(99.8)                           | A<br>(100)  | E<br>(99.6) | R<br>(78.8) | I<br>(74.2) | T<br>(88.7) | P<br>(100)  | P<br>(99.8) | P<br>(100)                                | Y<br>(100)  |
| 392               | I      | I        | S<br>(98.4)                           | N<br>(100)  | V<br>(63.7) | I<br>(87.3) | I<br>(59.8) | S<br>(88.6) | V<br>(47.5) | T<br>(58.6) | I<br>(49.9)<br>T<br>(49.6)                | A<br>(92.7) |
| 450               | T      | T        | N<br>(89.5)                           | N<br>(87.2) | S<br>(99.2) | D<br>(98.0) | S<br>(99.7) | D<br>(99.1) | K<br>(73.4) | P<br>(100)  | T<br>(99.3)                               | G<br>(100)  |
| 451               | E      | E        | S<br>(94.9)                           | S<br>(100)  | S<br>(98.3) | H<br>(79.7) | G<br>(99.8) | N<br>(100)  | E<br>(99.7) | I<br>(39.3) | E<br>(99.8)                               | S<br>(99.8) |
| 452               | F      | F        | D<br>(80.3)                           | D<br>(100)  | E<br>(99.2) | E<br>(85.9) | T<br>(99.8) | E<br>(99.9) | R<br>(99.4) | S<br>(51.0) | F<br>(99.8)                               | G<br>(99.7) |

NA residues conserved in influenza A N1 to N9 and Influenza B NA are highlighted in cyan. NA residues not conserved in Sh2N9 and Hunan N9 is highlighted in yellow.

<sup>a</sup> Number of non-redundant influenza NA sequences for subtype from the Influenza Virus Resource at the National Center for Biotechnology Information (NCBI) database (<https://www.ncbi.nlm.nih.gov/genomes/FLU/>) in Nov 28, 2018.

<sup>b</sup> Most common residue at position for subtype.

<sup>c</sup> Percent identity for most common residue.

<sup>d</sup> Sequence deletion as aligned to N2 NA.

**Table S5. Oligonucleotides used in this study. Related to Key Resources Table.**

| <b>REAGENT or RESOURCE</b>                                                | <b>SOURCE</b>               | <b>IDENTIFIER</b> |
|---------------------------------------------------------------------------|-----------------------------|-------------------|
| NA-22-VH-F:<br>GGT TCC ACT GGT GAC CAG GTG CAG<br>CTG GTG GAG TCT         | Integrated DNA Technologies | N/A               |
| NA-22-VH-R:<br>TCC CTT AGT AGA AGC TGA GGA GAC<br>GGT GAC CAG GG          | Integrated DNA Technologies | N/A               |
| NA-22-VL-F:<br>GGT TCC ACT GGT GAC CAG TCT GTG<br>CTG ACT CAG CCT GC      | Integrated DNA Technologies | N/A               |
| NA-22-VL-R:<br>AGC CTT TGG TTG TCC TAG GAC GGT<br>GAC CTT GGT CCC         | Integrated DNA Technologies | N/A               |
| NA-45-VH-F:<br>GGT TCC ACT GGT GAC CAG GTG CAG<br>CTG GTG GAG TCG         | Integrated DNA Technologies | N/A               |
| NA-45-VH-R:<br>TCC CTT AGT AGA AGC TGA GGA GAC<br>GGT GAC CAG GG          | Integrated DNA Technologies | N/A               |
| NA-45-VL-F:<br>GGT TCC ACT GGT GAC CAG TCT GTG<br>CTG ACT CAG CCG C       | Integrated DNA Technologies | N/A               |
| NA-45-VL-R:<br>AGC CTT TGG TTG TCC TAG GAC GGT<br>GAC CTT GGT CCC         | Integrated DNA Technologies | N/A               |
| NA-63-VH-F:<br>GGT TCC ACT GGT GAC GAG GTG CAG<br>CTG GTG GAG TCT G       | Integrated DNA Technologies | N/A               |
| NA-63-VH-R:<br>TCC CTT AGT AGA AGC TGA GGA GAC<br>GGT GAC CAG GG          | Integrated DNA Technologies | N/A               |
| NA-63-VL-F:<br>GGT TCC ACT GGT GAC GAC ATT GTG<br>ATG ACT CAG TCT CCA TCC | Integrated DNA Technologies | N/A               |
| NA-63-VL-R:<br>AGC GGC CAC CGT ACG TTT GAT CTC<br>CAG CTT GGT CCC C       | Integrated DNA Technologies | N/A               |
| NA-80-VH-F:<br>GGT TCC ACT GGT GAC CAG GTT CAG<br>CTG GTG CAG TCT G       | Integrated DNA Technologies | N/A               |
| NA-80-VH-R:<br>TCC CTT AGT AGA AGC TGA GGA GAC<br>GGT GAC CAG GG          | Integrated DNA Technologies | N/A               |
| NA-80-VL-F:<br>GGT TCC ACT GGT GAC GAC ATT GTG<br>ATG ACC CAG TCT CCA     | Integrated DNA Technologies | N/A               |
| NA-80-VL-R:<br>AGC GGC CAC CGT ACG TTC GAT ATC<br>CAC TTT GGT CCC AGG     | Integrated DNA Technologies | N/A               |

|                                                                                    |                             |     |
|------------------------------------------------------------------------------------|-----------------------------|-----|
| NA-73-F:<br>AGC CTT TGG TTG TCC TAG GAC GGT<br>CAG CTT GGT CCC                     | Integrated DNA Technologies | N/A |
| NA-73-R:<br>TCC CTT AGT AGA AGC TGA GGA GAC<br>GGT GAC CAG GG                      | Integrated DNA Technologies | N/A |
| Sh2N9ect-F:<br>CTA GCT AGT CTA GAA GGA ATT TCA<br>ATA ACT TAA CTA AAG GGC TCT GT   | Integrated DNA Technologies | N/A |
| Sh2N9ect-R:<br>GGA CTG GAA AGC TTT TAG AGG AAG<br>TAC TCT ATT TTA GCC CCA TCA      | Integrated DNA Technologies | N/A |
| Sh2N9stalk-F:<br>CTA GCT AGT CTA GAC TAA AAC CGG<br>GCT GCA ATT GC                 | Integrated DNA Technologies | N/A |
| Sh2N9stalk-R:<br>GGA CTG GAA AGC TTT TAG AGG AAG<br>TAC TCT ATT TTA GCC CCA TCA    | Integrated DNA Technologies | N/A |
| Sh2N9-Y169aH-F:<br>CAC AGT GCA CAA CAG CAG GGT GGA<br>ATG CA                       | Integrated DNA Technologies | N/A |
| Sh2N9-Y169aH-R:<br>CTG TTG TGC ACT GTG GGC GGT<br>GATGAT AGT G                     | Integrated DNA Technologies | N/A |
| HunanN9ect-F:<br>CTA GCT AGT CTA GAA GGA ATT TCA<br>ATA ACT TAA CTA AAG GGC TCT GT | Integrated DNA Technologies | N/A |
| HunanN9ect-R:<br>GGA CTG GAA AGC TTT TAG AGG AAG<br>TAC TCT ATT TTA GCC CCA TCA    | Integrated DNA Technologies | N/A |
